# Supplementary material for: Tsetse fly (Glossina pallidipes) midgut responses to Trypanosoma brucei challenge
Source: PubMed Central journal article supplement (PMC5738168; doi:10.1186/s13071-017-2569-7), 2017-12-19

**Additional file 2: Table S2.** Validation of *G. pallidipes* RNA Seq data with qPCR RNA-seq expression values (log<sub>2</sub> ratios) for ten genes plotted against qPCR values (log<sub>2</sub> ratios)

| Gene                  | Accession Number | qPCR Fold Change | Log2 of qPCR | RNA-seq Fold Change | Log2 of RNA-seq |
|-----------------------|------------------|------------------|--------------|---------------------|-----------------|
| Tep2                  | GPAI040205       | 3.61             | 1.85         | 2.76                | 1.46            |
| Multicopper oxidase   | GPAI025756       | 5.98             | 2.58         | 4.2                 | 2.07            |
| Glutamine synthase    | GPAI006387       | 4.18             | 2.06         | 2.08                | 1.06            |
| Heat shock protein 83 | GPAI002368       | 4.77             | 2.25         | 2.05                | 1.04            |
| Pyruvate carboxylase  | GPAI003647       | 1.84             | 0.88         | 2.11                | 1.08            |
| Transferrin           | GPAI1033230      | 2.34             | 1.23         | 2.19                | 1.13            |
| Serpin 4              | GPAI011576       | 3.20             | 1.68         | 2.44                | 1.28            |
| Serpin 6              | GPAI011576       | 3.20             | 1.68         | 1.16                | 0.21            |
| PGRP-LB               | GPAI047520       | 1.47             | 0.56         | 1.32                | 0.40            |
| Chitinase             | GPAI022616       | 9.19             | 3.20         | 6.76                | 2.76            |

**Additional file 2: Figure S1.** RNA-seq expression values (log<sub>2</sub> ratios) for ten genes plotted against qPCR values (log<sub>2</sub> ratios)

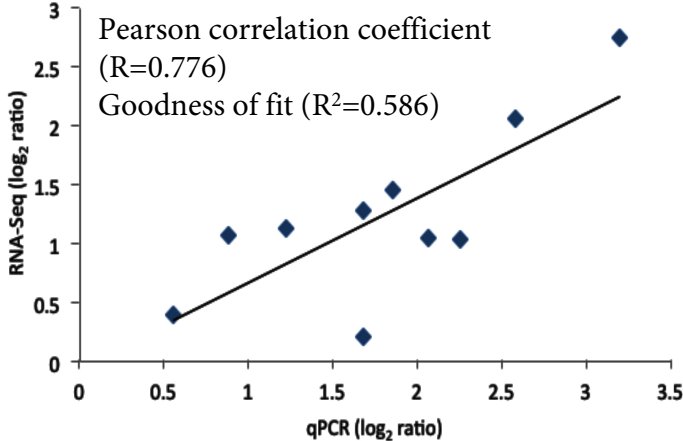

Supplement: 13071_2017_2569_MOESM2_ESM.pdf [file 13071_2017_2569_MOESM2_ESM.pdf]
